# Supplementary material
Source: ML conference proceedings conference paper supplement (https://openaccess.thecvf.com/content/CVPR2021/html/Schmidtke_Unsupervised_Human_Pose_CVPR_2021_paper.html)
Supplement: Supplementary file 1 [file Schmidtke_Unsupervised_Human_Pose_CVPR_2021_supplemental.zip]

Archive with 10 entries (9 files):
- 06748-supp/
- __MACOSX/._06748-supp
- 06748-supp/.DS_Store
- __MACOSX/06748-supp/._.DS_Store
- 06748-supp/06748-supp.pdf
- __MACOSX/06748-supp/._06748-supp.pdf
- 06748-supp/clip1.mp4
- __MACOSX/06748-supp/._clip1.mp4
- 06748-supp/clip2.mp4
- __MACOSX/06748-supp/._clip2.mp4
